# Supplementary material
Source: PubMed Central journal article supplement (PMC8370682)
Supplement: iai.00059-21-s0001.pdf [file iai.00059-21-s0001.pdf]

# Supplemental Figure 1 – P21 qPCR

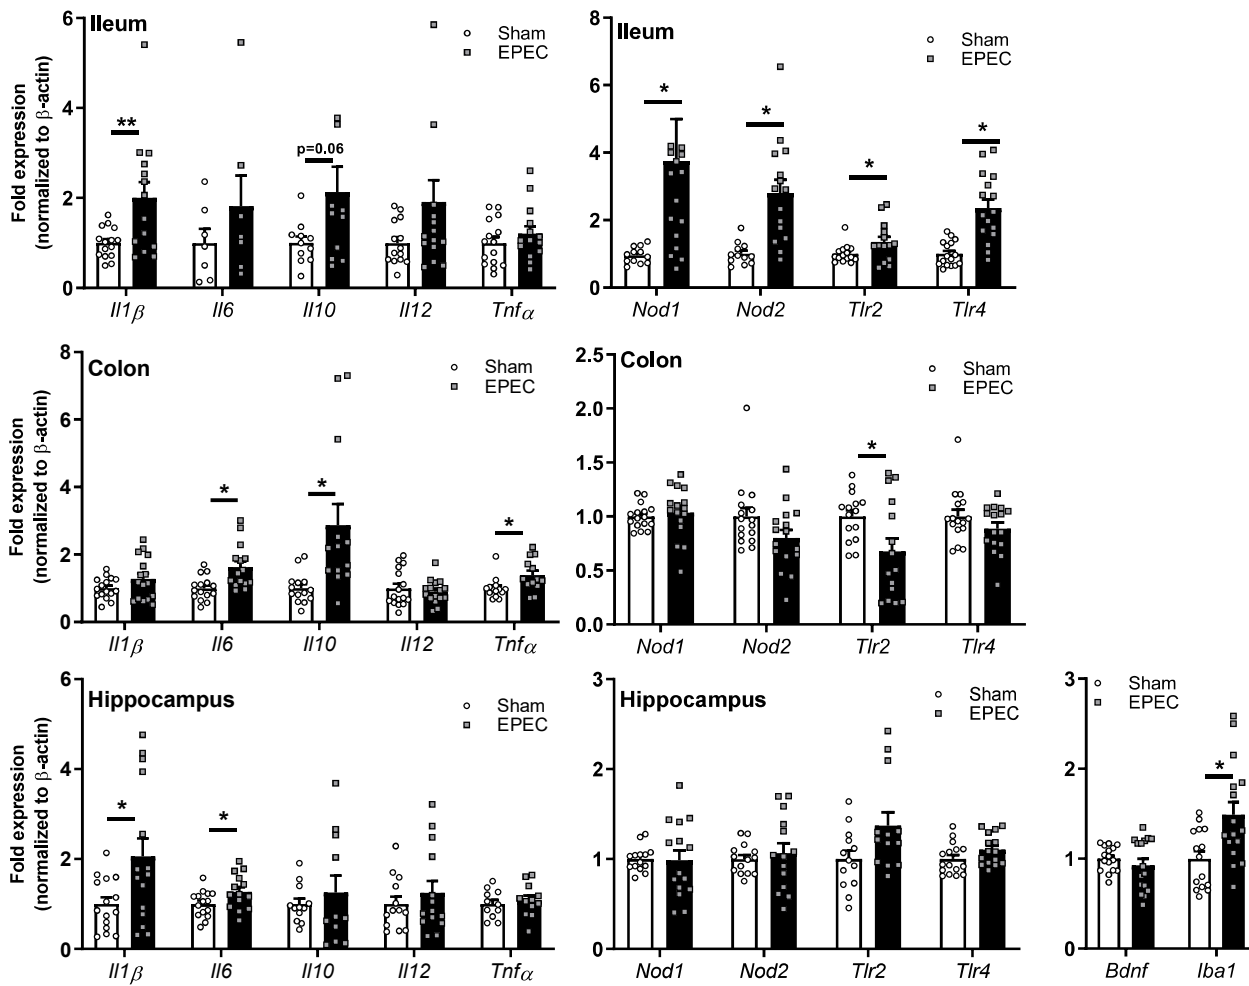

## Supplemental Figure 2 – Cerebellum and PFC

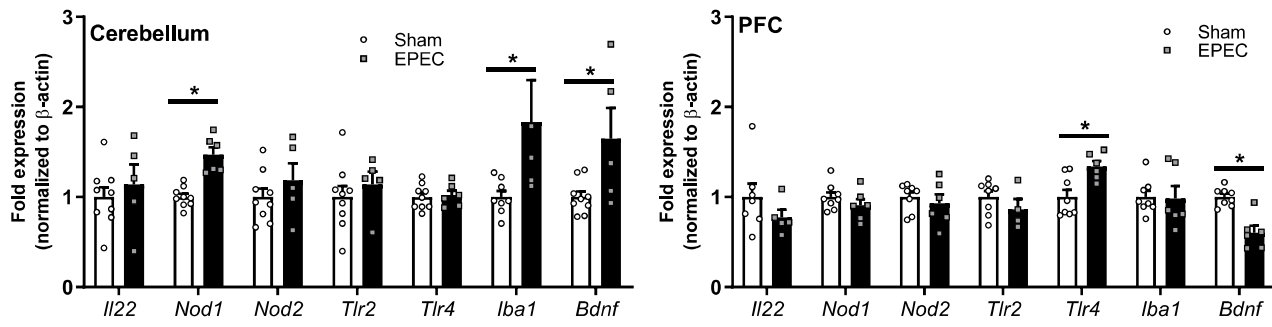

1 **SUPPLEMENTAL FIGURE LEGENDS**

2 **Supplemental Figure 1. Limited evidence of immune activation at P21 in EPEC-infected**  
3 **mice.** Relative mRNA expression in ileum, colon, and hippocampus at P21. (N=12-16 mice per  
4 group; \*p≤0.05 by Student's T test (± Welch's correction), or Mann-Whitney where appropriate).

5 **Supplemental Figure 2. Limited evidence of immune activation in the cerebellum and pre-**  
6 **frontal cortex region in EPEC-infected mice in adulthood.** Relative mRNA expression in  
7 cerebellum and pre-frontal cortex in adult mice. (N=8 mice per group; \*p≤0.05 by Student's T  
8 test (± Welch's correction), or Mann-Whitney where appropriate).

9

10

11

12

13

14

15

16

17

18

19

20

21 **Supplemental Table #1 – PCR primer sequences**

| <b>Primer Name</b> | <b>Forward (5'→3')</b>   | <b>Reverse (5'→3')</b>   |
|--------------------|--------------------------|--------------------------|
| <i>IκB</i>         | GAAGCCGCTGACCATGGAA      | GATCACAGCCAAGTGGAGTGGA   |
| <i>Bdnf</i>        | TGCAGGGGCATAGACAAAAGG    | CTTATGAATCGCCAGCCAATTCTC |
| <i>Il10</i>        | GCTCTTACTGACTGGCATGAG    | CGCAGCTCTAGGAGCATGTG     |
| <i>B-actin</i>     | GGCTGTATTCCCCTCCATCG     | CCAGTTGGTAACAATGCCATGT   |
| <i>RegIIIγ</i>     | TTCCTGTCCTCCATGATCAAAA   | CATCCACCTCTGTTGGGTTCA    |
| <i>Il12</i>        | TGGTTTGCCATCGTTTTGCTG    | ACAGGTGAGGTTCACTGTTTCT   |
| <i>Il22</i>        | ATGAGTTTTTCCCTTATGGGGAC  | GCTGGAAGTTGGACACCTCAA    |
| <i>Il6</i>         | TAGTCCTTCCTACCCCAATTTCC  | TTGGTCCTTAGCCACTCCTTC    |
| <i>Il1β</i>        | CTGTGACTCATGGGATGATGATG  | CGGAGCCTGTAGTGCAGTTG     |
| <i>Nod1</i>        | TCCCTTGCCTGTGAGCAGAAAGTA | GTGGGTATGTGCCATGCTTTGCTT |
| <i>Nod2</i>        | CACACATGGCCTTTGGTTCCAGT  | AAAGAGCTGCAGTTGAGGGAGGAA |
| <i>Tnfa</i>        | CCCTCACACTCAGATCATCTTCT  | GCTACGACGTGGGCTACAG      |
| <i>Tlr2</i>        | GCAAACGCTGTTCTGCTCAG     | AGGCGTCTCCCTCTATTGTATT   |
| <i>Tlr4</i>        | AGCTCCTGACCTTGGTCTTG     | CGCAGGGGAACTCAATGAGG     |
| <i>Tlr6</i>        | TGAGCCAAGACAGAAAACCCA    | GGGACATGAGTAAGGTTCTGTT   |
| <i>Tlr9</i>        | ATGGTTCTCCGTCTGAAGGACT   | GAGGCTTCAGCTCACAGGG      |
| <i>Pparγ</i>       | TCCTGTAAAAGCCCGGAGTAT    | GCTCTGGTAGGGGCAGTGA      |
| <i>Iba1</i>        | GTCCTTGAAGCGAATGCTGG     | CATTCTCAAGATGGCAGATC     |

22

23
